# Supplementary material for: Hyperspectral images: a qualitative approach to evaluate the chemical profile distribution of Ca, K, Mg, Na and P in edible seeds employing laser-induced breakdown spectroscopy
Source: Royal Society of Chemistry journal article supplement (doi:10.1039/c9ay01916b), 2019-01-01
Supplement: c9ay01916b1.pdf [file c9ay01916b1.pdf]

Hyperspectral images: A qualitative approach to evaluate the chemical  
profile distribution of Ca, K, Mg, Na and P in edible seeds employing  
Laser-induced breakdown spectroscopy

Raimundo R. Gamela, Marco A. Sperança, Daniel F. Andrade and Edenir  
R. Pereira-Filho\*

Group of Applied Instrumental Analysis, Department of Chemistry, Federal University  
of São Carlos, P.O. Box 676, São Carlos, São Paulo State, 13565-905, Brazil

\*Corresponding author: Edenir R. Pereira-Filho

Phone number: +55 16 3351-8092

E-mail: [erpf@ufscar.br](mailto:erpf@ufscar.br)

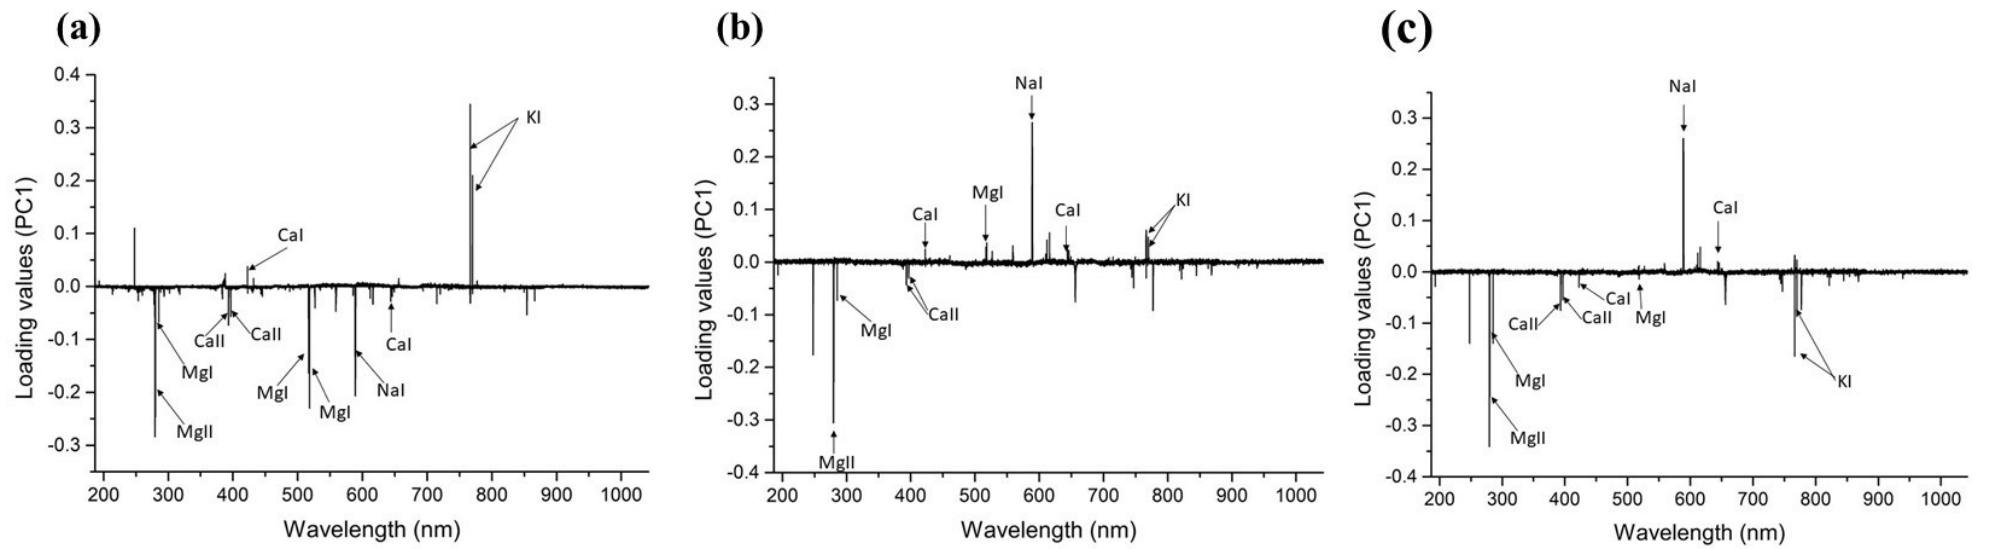

**Figure 1S.** Loading values for the pea seed for pulses: 1 (a), 5 (b) and 10 (c)

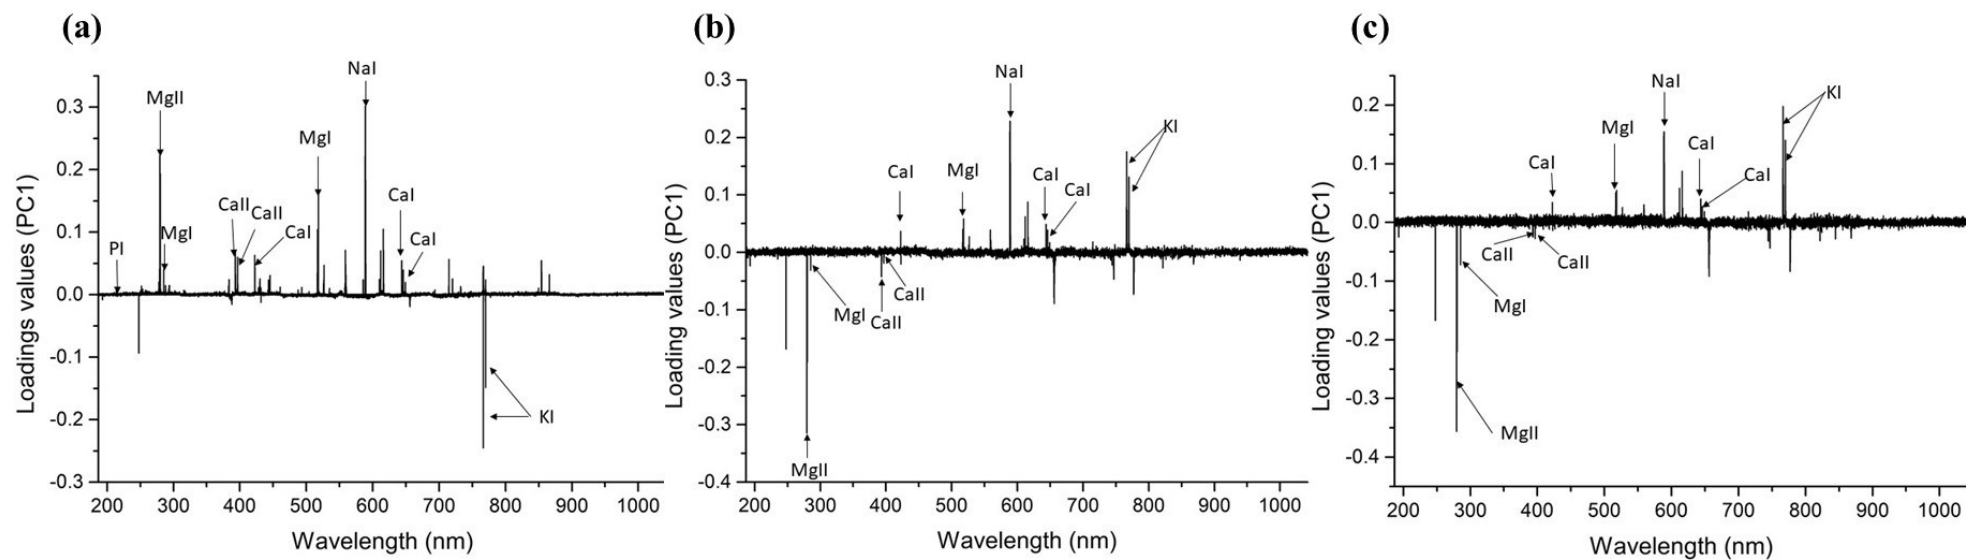

**Figure 2S.** Loading values for the lentil seed for pulses: 1 (a), 5 (b) and 10 (c)

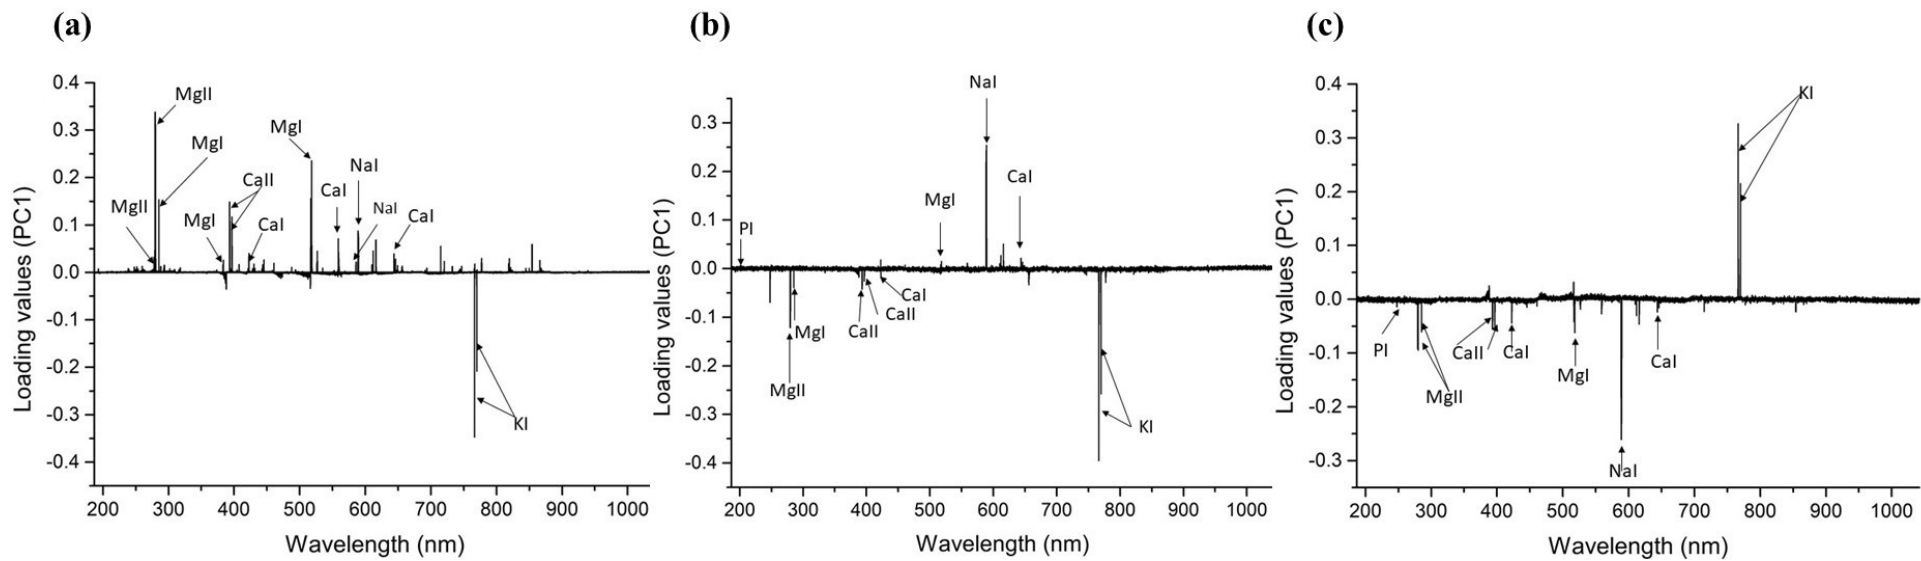

**Figure 3S.** Loading values for the pumpkin seed for pulses: 1 (a), 5 (b) and 10 (c)
